# Supplementary material for: Nitrogen-doped carbon quantum dots from biomass as a FRET-based sensing platform for the selective detection of H2O2 and aspartic acid
Source: Royal Society of Chemistry journal article supplement (doi:10.1039/d3su00343d), 2023-11-13
Supplement: d3su00343d1.pdf [file d3su00343d1.pdf]

## Nitrogen-doped Carbon Quantum Dots from Biomass as a FRET-based Sensing Platform for the Selective detection of H<sub>2</sub>O<sub>2</sub> and Aspartic Acid

K. Sandeep Raju, Gouri Sankar Das, and Kumud Malika Tripathi\*

Department of Chemistry, Indian Institute of Petroleum and Energy, Visakhapatnam, Andhra Pradesh, 530003

\*Corresponding author: [kumud20010@gmail.com](mailto:kumud20010@gmail.com), [kumud@iipe.ac.in](mailto:kumud@iipe.ac.in)

**Table S1:** Comparison of LOD of N-CQDs towards the detection of H<sub>2</sub>O<sub>2</sub>

| S. No | Material                                                                           | Limit of detection | Application                           | Ref.      |
|-------|------------------------------------------------------------------------------------|--------------------|---------------------------------------|-----------|
| 1.    | N-CQDs from Biomass                                                                | 26.4 mM            | H <sub>2</sub> O <sub>2</sub> sensing | This work |
| 2.    | Composite of N-CQDs and silver nanoparticles                                       | 4.7 μM             | H <sub>2</sub> O <sub>2</sub> sensing | 1         |
| 3.    | Europium-doped GdVO <sub>4</sub> nanocrystals                                      | 1.6 μM             | H <sub>2</sub> O <sub>2</sub> sensing | 2         |
| 4.    | CdSe@ZnS                                                                           | 0.3 μM             | H <sub>2</sub> O <sub>2</sub> sensing | 3         |
| 5.    | Thiourea-functionalized graphene aerogel                                           | 2.42 μM            | H <sub>2</sub> O <sub>2</sub> sensing | 4         |
| 6.    | Cu <sub>3</sub> [P <sub>2</sub> W <sub>18</sub> O <sub>62</sub> ] and HKUST-1 MOFs | 0.17 μM            | H <sub>2</sub> O <sub>2</sub> sensing | 5         |

**Table S2:** Comparison of LOD of N-CQDs towards the detection of aspartic acid

| S. No | Material                           | Limit of detection | Application           | Ref.      |
|-------|------------------------------------|--------------------|-----------------------|-----------|
| 1.    | N- CQDs from mass                  | 134.2 nM           | Aspartic acid sensing | This work |
| 2.    | Cd-based metal organic frame works | 152 nM             | Aspartic acid         |           |

|    |                                                                |         |                       |    |
|----|----------------------------------------------------------------|---------|-----------------------|----|
|    |                                                                |         | sensing               | 6  |
| 3. | imidazolium-modified cationic dansyl derivative (1)            | 600 nM  | Aspartic acid sensing | 7  |
| 4. | N-CQDs (Citric acid and urea as source of nitrogen and carbon) | 90 nM   | Aspartic acid sensing | 8  |
| 5. | polythiophene–gold nanoparticles composite                     | 32 nM   | Aspartic acid sensing | 9  |
| 6. | 3-Methoxysalicylaldehyde thiosemicarbazone                     | 87.4 nM | Aspartic acid sensing | 10 |

### References:

1. L. S. Walekar, P. Hu, F. Liao, X. Guo and M. Long, *Microchimica Acta*, 2017, **185**, 31.
2. V. Muhr, M. Buchner, T. Hirsch, D. J. Jovanović, S. D. Dolić, M. D. Dramićanin and O. S. Wolfbeis, *Sensors and Actuators B: Chemical*, 2017, **241**, 349-356.
3. Z. Zhou, L. Yang, L. Huang, Y. Liao, Y. Liu and Q. Xiao, *Analytica Chimica Acta*, 2020, **1106**, 176-182.
4. J. Kaushik, Gunture, K. M. Tripathi, R. Singh and S. K. Sonkar, *Chemosphere*, 2022, **287**, 132105.
5. C. Shi, S. Di, H. Jiang, C. Wang, C. Wang, K. Yu, J. Lv and B. Zhou, *Dalton Transactions*, 2023, **52**, 9406-9413.
6. T. Gao, L. Gao, J. Zhang, W. Zhou, Z. Zhang, X. Niu and T. Hu, *Journal of Luminescence*, 2021, **231**, 117798.
7. Y. Zhang, J. Cao and L. Ding, *Journal of Photochemistry and Photobiology A: Chemistry*, 2017, **333**, 56-62.
8. R. Tabaraki and O. Abdi, *Journal of Fluorescence*, 2019, **29**, 751-756.
9. H. Guan, P. Zhou, X. Zhou and Z. He, *Talanta*, 2008, **77**, 319-324.
10. M. Ranjani, P. Kalaivani, F. Dallemer, S. Selvakumar, T. Kalpana and R. Prabhakaran, *Inorganica Chimica Acta*, 2022, **530**, 120683.
